# Supplementary material
Source: Springer Nature journal article supplement (https://www.springermedizin.de/resource/supplementary/12885_2006_590_MOESM6_ESM.pdf/9469838)

## GRANTA-519

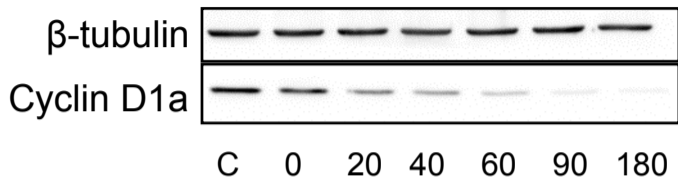

**28 min**

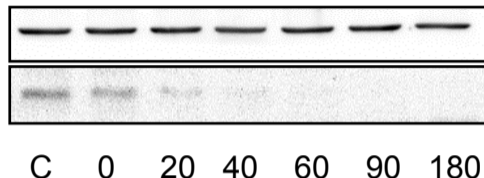

**12 min**

## JeKo-1

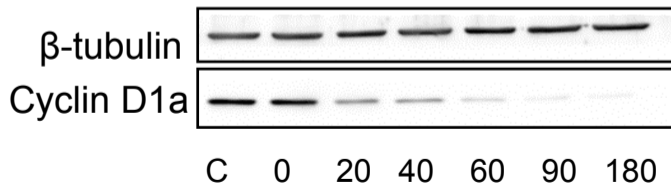

**18 min**

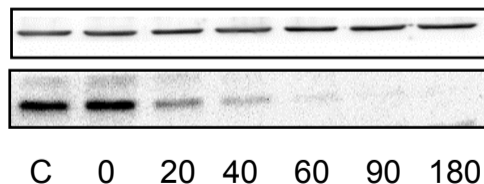

**13 min**

Supplement: MOESM6 [file 9469838]
